# Supplementary material for: An isotope dilution-liquid chromatography-tandem mass spectrometry (ID-LC-MS/MS)-based candidate reference measurement procedure for the quantification of topiramate in human serum and plasma
Source: publisher site journal article supplement (doi:10.1515/cclm-2022-1273), 2023-07-19
Supplement: Supplementary file 3 [file j_cclm-2022-1273_suppl_003.docx]

**SUPPLEMENTAL MATERIAL 3**

**An isotope dilution-liquid chromatograph-tandem mass spectrometry (ID-LC-MS/MS)-based candidate reference measurement procedure for the quantification of topiramate in human serum and plasma**

Linda Salzmanna, Tino Speschaa, Neeraj Singhb, Anja Kobela, Vanessa Fischerb, Tobias Schierschera, Friederike Baulandc, Andrea Geistangerb, Lorenz Rischa, Christian Geletnekyb, Christoph Segera, Judith Taibonb*

aDr. Risch Ostschweiz AG, Lagerstrasse 30, 9470 Buchs, Switzerland

bRoche Diagnostics GmbH, Nonnenwald 2, 82377 Penzberg, Germany

cChrestos Concept GmbH & Co. KG, Girardestaße 1–5, 45131 Essen, Germany

* Corresponding author:

Judith Taibon, PhD, Nonnenwald 2, 82377 Penzberg, Germany

Phone: +49 8856 6012941

E-mail: judith.taibon@roche.com

**Estimation of measurement uncertainty**

Measurement uncertainty (MU) was determined according to the GUM [1] and based on Taibon et al. [2] and considered following the main steps: uncertainty estimation of qNMR target value assignment of the primary reference material (I), uncertainty estimation of the preparation of calibrator materials (II) and the estimation of uncertainty of the LC-MS/MS method (III).

(I) qNMR measurements were performed in six replicates using an SI traceable internal standard for the quantification of the absolute content (Px, purity of the analyte given as mass fraction) of the analyte.

For the estimation of uncertainty, a simplified equation (1) is used:

Uncertainty components of weighing, measuring and integrating are included as type A uncertainties in the qNMR measurements. Purity (*Pstd)* and uncertainty (*uncPstd)* of the internal standard are combined with the mean (*A*) and uncertainty (*uncA)* of qNMR measurements to the combined uncertainty of the purity of the reference material *unc*(*Px*) using the following equation (2):

(II) A bottom up approach was used to estimate the MU related to the serum based calibration material *unc(cal)* includingfollowing uncertainty components: purity of the reference material, weighing, preparation of stock solution and dilutions, preparation of spike solution and preparation of matrix based calibrator level. Uncertainties of the laboratory equipment used, such as ultra-micro balance, pipettes and volumetric flasks, were provided by the manufacturer.

Analyte concentration *C* [µg/mL] of the matrix based calibrator level was calculated using the following equation (3):

where *M* is the weighted mass, *P* is the purity, *Vflask* is the volume of the volumetric flask, while *Vstock Vdilution,*  *Vspike* and *Vserum* are pipetted volumes.

Generally, uncertainties are combined by the rules of error propagation. Let y = f(x). The uncertainty of y is approximated by the propagation of uncertainty using the following equation (4)

as long as all components xi are not correlated to each other.

Therefore, considering equation (3) and applying formula (4) for each individual step (preparation of stock solution, dilution of stock solution and spike solution), final measurement uncertainty of matrix-based calibrator levels was determined using the following equation (5):

where *Ch* and *uncCh* is the analyte concentration and uncertainty of the spike solution, *Vh* and *uncVh* the volume and uncertainty of the pipetted spike solution, *Vj*and *uncVj*the added volume and uncertainty of the pipetted calibrator matrix.

(III) Estimation of total variability of the LC-MS/MS method was performed using a precision experiment (type A uncertainty) and considered the following steps: sample preparation of calibrators, preparation of internal standard, preparation of samples, measurement of calibrators, generation of the calibration curve and measurement and evaluation of sample results. As described above, precision was evaluated performing a multi-day validation experiment and variability components were determined using an ANOVA based variance-components analysis. Uncertainties from precision experiment (*uncprec*) were expressed as standard deviation (SD).

The combined measurement uncertainty of the whole approach for a single measurement (n=1) was estimated as a combination of the uncertainty of calibrator preparation (*unccal*) and calculated uncertainty of the precision experiment (*uncprec*) (6):

To avoid error underestimation, for each individual sample concentration level, unccal of the calibrator level with the higher uncertainty was chosen for this combination of uncertainties. The derived combined uncertainty was multiplied by a coverage factor of k = 2, which corresponds to an approximate confidence level of 95% assuming a normal distribution, to obtain an expanded uncertainty.

For the assignment of reference or target values, multiple sample preparations for each sample were performed on at least two different days and the result was calculated as the arithmetic mean (n = x). Combined measurement uncertainty was calculated as combined uncertainty of the calibrator preparation (unccal) and uncertainty (SD) of the mean of measurement results (uncmean), as given by the following equation (7):

To avoid error underestimation, for each individual sample concentration level, unccal of the calibrator level with the highest uncertainty was chosen for this combination of uncertainties. The derived combined uncertainty was multiplied by a coverage factor of k = 2, which corresponds to an approximate confidence level of 95% assuming a normal distribution, to obtain an expanded uncertainty.

**References**

1. Joint Committee for Guides in Metrology. Evaluation of measurement data – Guide to the expression of uncertainty in measurement, GUM 1995 with minor corrections. Available from: https://www.bipm.org/documents/20126/2071204/JCGM_100_2008_E.pdf/cb0ef43f-baa5-11cf-3f85-4dcd86f77bd6?version=1.10&t=1659082531978&download=true [Accessed 22 Sep 2022].
2. Taibon J, al e. An isotope dilution-liquid chromatograph-tandem mass spectrometry (ID-LC-MS/MS)-based candidate reference measurement procedure (RMP) for the quantification of aldosterone in human serum and plasma (PLACEHOLDER). 2022
